# Supplementary material
Source: HighWire-hosted journal article supplement (http://jpet.aspetjournals.org/highwire/filestream/136412/field_highwire_adjunct_files/1/JPET208421_Figure2Supp-captions-scaled.pdf)
Supplement: JPET208421_Figure2Supp-captions-scaled.pdf [file JPET208421_Figure2Supp-captions-scaled.pdf]

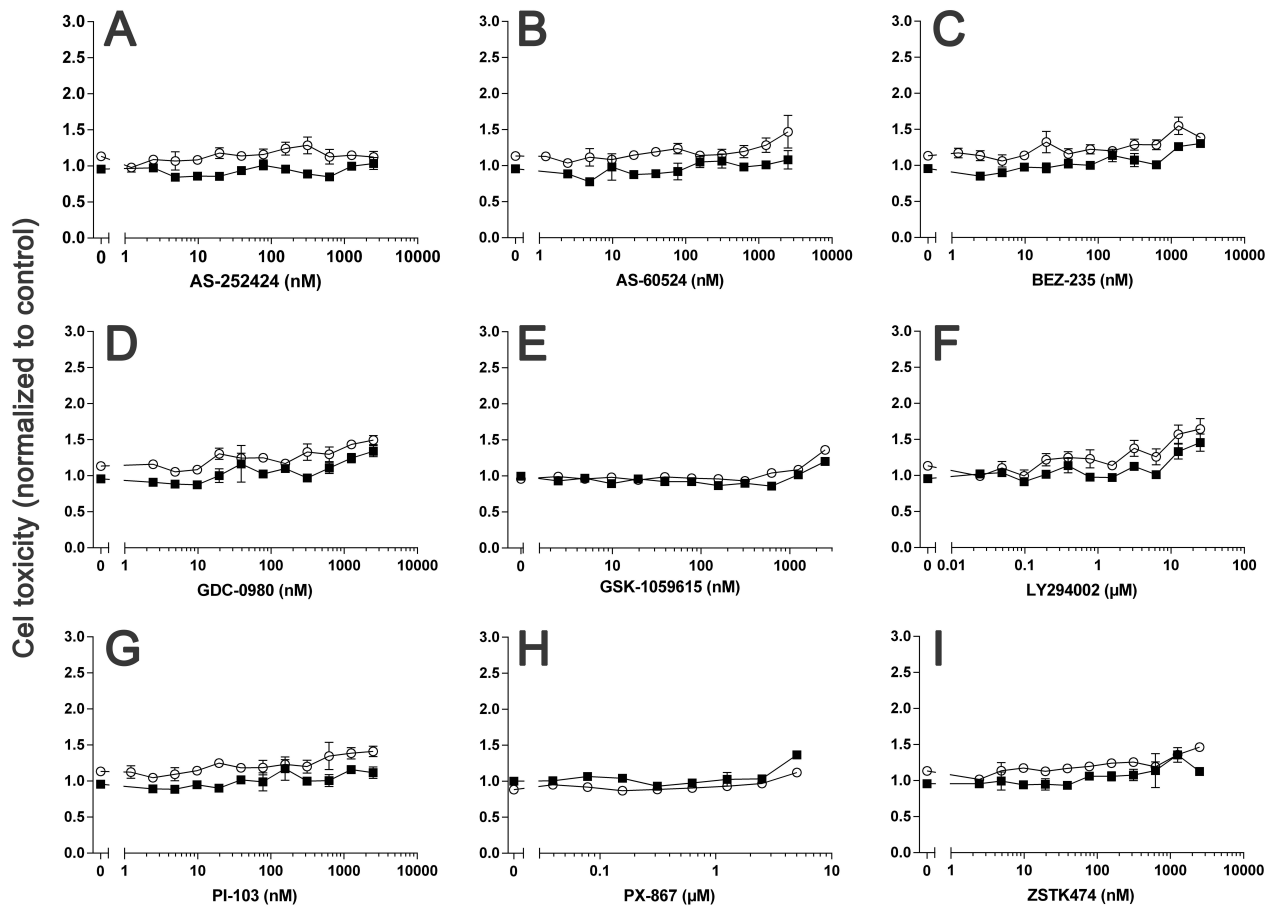

## Supplemental Figure 2

Pharmacological profiling of phosphoinositide-3-kinase inhibitors as mitigators of ionizing radiation-induced cell death. John S. Lazo, Elizabeth R. Sharlow, Michael W. Epperly, Ana Lira, Stephanie Leimgruber, Erin M. Skoda, Peter Wipf, Joel S. Greenberger.

Journal of Pharmacology and Experimental Therapeutics

Cell membrane permeability after IR and PI3K inhibitor treatment. NCCIT cells were exposed to 0 (■) or 4 (○) Gy  $\gamma$ IR and 1 h later treated with 0.1% DMSO vehicle control or various concentrations of AS-252424 (Panel A), AS-60524 (Panel B), BEZ-235 (Panel C), GDC-0980 (Panel D), GSK-1059615 (Panel E), LY294002 (Panel F), PI-103 (Panel G), PX-867 (Panel H) and ZSTK474 (Panel I). After 48 h, cytotoxicity was determined with CellTox Green. N = 3. Bars = S.E.M.
